# Supplementary material for: Clinical diagnostic value of American College of Radiology thyroid imaging report and data system in different kinds of thyroid nodules
Source: Springer Nature journal article supplement (doi:10.1186/s12902-022-01053-z), 2022-05-31
Supplement: 12902_2022_1053_MOESM2_ESM.pdf [file 12902_2022_1053_MOESM2_ESM.pdf]

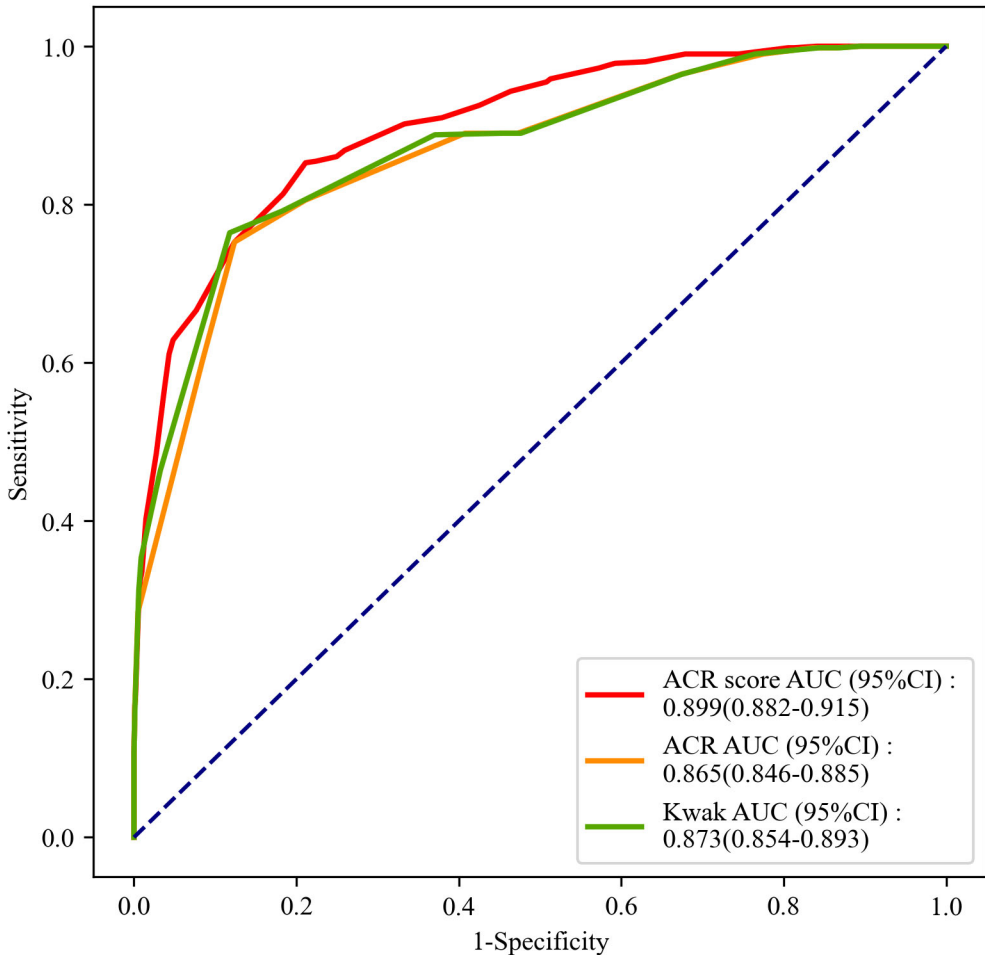

Supplementary Figure 1

The ROC curve of the discriminative efficiencies of ACR score, ACR TI-RADS and Kwak TI-RADS in benign nodules, PTC or MTC from patients without benign nodules, PTC or MTC.
